# Supplementary material for: Salvage regimens using conventional chemotherapy agents for relapsed/refractory adult AML patients: a systematic literature review
Source: Springer Nature journal article supplement (doi:10.1007/s00277-018-3304-y), 2018-04-21
Supplement: MOESM6 [file 15711590]

**Table 6- Studies of salvage therapy with non-intensive approaches in relapse or refractory AML patients.**

| **Study,**  **year** | **Design** | **Chemotherapy scheme** | **N (R/RF)** | **Age, median (range)** | **Induction outcome [n (%)]** | **Median CRD** | **Median OS** | **Other survival outcomes** | **HSCT rate after salvage therapy** |
| --- | --- | --- | --- | --- | --- | --- | --- | --- | --- |
| **Ara C non-intensive regimens** | | | | | | | | | |
| Jensen et al. 1994 [156] | Non-RCT, PROSP, UC, 1-Arm | Ara C (10 mg/m2/12h SC d:1-21) | 25  (12R, 13 RF) | 45 (15-61) | CR: 11 (44)  In R, CR: 6 (50)  In RF, CR: 5 (38)  ED: 3 (12) | NA | 8 m | NA | 2 (8) allo-HSCT |
| Venditti et al. 1995 [157] | Non-RCT, PROSP, UC, 1-Arm | Ara C (20 mg/12h SC d:1-10 every 4w) + ATRA (45 mg/m2 oral) | 33  (6R, 15RF) | 67 (39-82) | CR: 16 (49)  ED: 3 (9) | 8 m | NA | NA | NA |
| **Gemtuzumab ozogamicin monotherapy** | | | | | | | | | |
| Lang et al. 2002 [51] | Non-RCT, PROSP, MC, 2-Arms (see table 2) | GO (9 mg/m2 d:1, 19, 37) | 104  (104 R) | 60 (22-84) | NA | NA | OS at 1.5 m: 89% | NA | NA |
| Piccaluga et al. 2004 [158] | Non-RCT, PROSP, MC, dose-finding, 3-Arms | GO (9 mg/m2 d:1)*1-3 courses at 14 d  or  GO (6 mg/m2 d:1)*1-3 courses at 14 d  or  GO (1.5 mg/m2 d:1) | 15  (12 R, 3 RF)  8  (5 R, 3 RF)  1 (1 R) | 63 (20-75)  64 (22-67)  62 | CR: 4 (27)  ED: 1 (7)  CR: 0 (0)  ED: 2 (25)  CR: 1 (100)  ED: 0 (0) | 5  NA  6 m | 4 m  1.3 m  7 m | NA | 1 (4) allo-HSCT |
| Larson et al. 2005 [159] | Non-RCT, PROSP, Phase II, MC, 1-Arm | GO (9 mg/m2 d:1)*2 courses at 14 d | 277  (161 ER, 116 LR) | 61  (20-87) | CR: 71 (26)  ER: 31 (19)  LR: 40 (34)  ED: 4 (0.01) | 5.2 m | 4.9 m | NA | 25 (9), 14 allo-HSCT & 11 auto-HSCT |
| Taksin et al. 2007 [160] | Non-RCT, PROSP, Phase II, MC, 1-Arm | GO (3 mg/m2 d:1, 4, 7) | 57  (57 R) | 64 (22-80) | CR: 19 (33)  ED: 4 (7) | 11 m | 8.4 m | NA | 7 (12) HSCT, 3 allo-HSCT & 4 auto-HSCT |
| **Clofarabine monotherapy** | | | | | | | | | |
| Roberts et al. 2015 [121] | Non-RCT, PROSP, MC, 2-Arms (see table 4) | CLOFA (15-30 mg/m2 d:1-5) | 19a  (7R, 12 RF) | 72 (34-77)a | CR: 2 (11)a | NA | 3 m in both arms | NA | 12 (14) allo-HSCT |
| **Azacitidine monotherapy** | | | | | | | | | |
| Bolaños- Meade et al. 2010 [161] | Non-RCT, RETROSP, UC, 1-Arm | AZA (75 mg/m2 SC d:1-5 or 1-7)*6 cycles (median) | 10 R HSCT | 55 (25-67) | CR: 6 (60) | NA | 14.1 m | NA | None |
| Al-Ali et al. 2012 [162] | Non-RCT, PROSP, Phase I/II, MC, 1-Arm | AZA (75 mg/m2 SC d:1-5 every 28 d) | 20  (13 R, 7 RF) | 67 (32-83) | CR: 0 (0)  ED: 6 (30) | NA | 2.9 m | NA | NA |
| Ivanoff et al. 2013 [163] | Non-RCT, RETROSP, MC, 1-Arm | AZA (75 mg/m2 SC d:1-7 every 28 d) | 47  (20 R, 27RF) | 63 (29-79) | CR: 10 (21) | 6 m | 9 m | NA | 6 (13) allo-HSCT |
| Itzykson et al. 2015 [164] | Non-RCT, RETROSP, MC, 1-Arm | AZA (75 mg/m2 SC d:1-7 every 28 d)* 4 or more cycles | 130  (67 R, 63 RF) | 67 (50-80) | CR: 22 (17)  In R, CR: 13 (19)  In RF, CR: 9 (14) | 11.9 m  (3-40) | 8.4 m  OS at 1 y: 29% | NA | 6 (5) allo-HSCT |
| Stahl et al. 2016 [165] | Non-RCT, RETROSP, MC, 2-Arms (see below in this table) | AZA (75 mg/m2 SC d:1-7 every 28 d) or different regimens | 360  All 656  (365 R, 296 RF) | NA | CR: 105 (16)  in both arms | NA | 6.7 m  All, 6.5 m | NA | NA |
| **Decitabine monotherapy** | | | | | | | | | |
| Ritchie et al. 2013 [166] | Non-RCT, RETROSP, UC, 2-Arms (see below in this table) | DAC (20 mg/m2 d:1-10) | 57  (57 R or RF) | 66 (21-88) in both arms | CR: 16 (16) in both arms | NA | 7 m  All, 5.9 m | NA | 1 (1) allo-HSCT in both cohorts |
| Stahl et al. 2016 [165] | Non-RCT, RETROSP, MC, 2-Arms (see above in this table) | DAC (20 mg/m2 d:1-5) or different regimens | 274  All 656  (365 R, 296 RF) | NA | CR: 105 (16)  in both arms | NA | 5.7 m  All, 6.5 m | NA | NA |
| **Azacitidine combinations** | | | | | | | | | |
| Raffoux et al. 2010 [167] | Non-RCT, PROSP, MC, 1-Arm | AZA (75 mg/m2 SC d:1-7) + VPA (35 to 50 mg/kg d:1-7) + ATRA (45 mg/m2 oral d:8-28)+ 2-6 courses every 4 w | 13  (13 R or RF) | 72 (50-87)b | CR: 2 (15) | NA | 2.9 m | NA | NA |
| **Decitabine + Gemtuzumab ozogamicin regimens** | | | | | | | | | |
| Chowdhury et al. 2009 [168] | Non-RCT, PROSP, MC, 1-Arm | DAC (20 mg/m2 d:1-5) + GO (3 mg/m2 d:6, 9, 12) | 12  (4 R, 1 RF, 7 R HSCT) | 47 (29-66) | CR: 5 (46)  In RF, CR: 0 (0)  In R, CR: 2 (50)  In R HSCT, CR: 3 (43) | NA | 6 m | NA | 5 (42) allo-HSCT |
| Ritchie et al. 2013 [166] | Non-RCT, RETROSP, UC, 2-Arms (see above in this table) | DAC (20 mg/m2 d:1-5) + GO (3 mg/m2 d:5) | 45  (45 R or RF) | 66 (21-88) in both arms | CR: 16 (16) in both arms | NA | 3.6 m  All, 5.9 m | NA | 1 (1) allo-HSCT in both cohorts |
| Daver et al. 2017 [169] | Non-RCT, PROSP, Phase II, UC, 1-Arm | DAC (20 mg/m2 d:1-5) + GO (3 mg/m2 d:5). If d-14 bone marrow biopsy showed ≥20% cellularity with ≥5% blast: additional DAC cycle.  Post-induction: cycles every 4-8 w | 33  (28 ER-RF, 5 LR-RF) | 70 (27-89)c | CR: 8 (24)  ER-RF, CR: 5 (18)  LR-RF, CR: 3 (60)  ED: 3 (3) | 5.8 mc  1 m  3 m | 3.5 m  8 m | NA | NA |

**Abbreviations.** AD: aplastic death, AML: acute myeloid leukemia, Ara C: cytarabine, ATRA: all-trans retinoic acid, AZA: azacitidine, CLOFA: clofarabine, CR: complete remission, d: days, DAC: decitabine, DLI: donor lymphocyte infusion, ED: early death, GO: gemtuzumab ozogamicin, m: months, mCRD: median CR duration, mDFS: median disease-free survival, MDS: myelodysplastic syndrome, mOS: median overall survival, MPS: myeloproliferative syndrome, N: population of relapsed/refractory patients with AML, NA: not available, NR: not reached, OS: overall survival, R: relapse, RCT: randomized clinical trial, RF: refractory, RFS: relapse-free survival, VPA: valproic acid, w: weeks, y: year.

a Results in the entire cohort, including 6 AML *de novo*, 11 secondary & 2 MDS.

b Results of the entire cohort of 65 high risk AML-MDS patients, 55 AML including 13 relapsed/refractory patients & 43 untreated AML, 10 MDS & 30 unfavorable karyotypes.

c

OS & CR has been estimated in months in the cases that it was reported in days (1 month = 30 days) & weeks (1 month = 4.3 weeks).
