# Supplementary material for: Salvage regimens using conventional chemotherapy agents for relapsed/refractory adult AML patients: a systematic literature review
Source: Springer Nature journal article supplement (doi:10.1007/s00277-018-3304-y), 2018-04-21
Supplement: MOESM7 [file 15711590]

**Supplemental Table 1- Studies of intensive salvage therapy with cytarabine in monotherapy in relapse or refractory AML patients.**

| **Study, year** | **Chemotherapy scheme** | **CR rate** | **P value** | **mCRD** | **P value** | **Median OS** | **P value** | **OS %** | **P value** | **Other rates** | **P value** |
| --- | --- | --- | --- | --- | --- | --- | --- | --- | --- | --- | --- |
| Vogler et al. 1986 [16]  (Tables 1 & 5) | Ara C  vs  AMSA | CR: 3 (12)  vs  CR: 3 (13) | ns | 0.9 m  vs  2.8 m | NA | NA | NA | NA | NA | NA | NA |
| Capizzi et al. 1988 [17] (Tables 1 & 5) | Ara C  vs  Ara C + ASNase | CR: 24 (24)  vs  CR: 36 (38) | 0.02 | 4.9 m  vs  4.9 m | 0.98 | In <60 y, 3.6 m  vs  In <60 y, 7.9 m | 0.05 | NA | NA | NA | NA |
| Martiat et al. 1990 [34] (Table 2) | Ara C + MITO  vs  Ara C + AMSA | CR: 15 (58)  vs  CR: 12 (46) | 0.41 | 12 m  vs  11 m | 0.64 | 12 m  vs  8 m | 0.33 | NA | NA | NA | NA |
| Link et al. 1990 [59] (Table 3) | **MAV-A:** Ara C + MITO + ETOP (100 mg/m2)  vs  **MAV-B:** Ara C + MITO + ETOP (120 mg/m2) | CR: 9 (56)  vs  CR: 12 (60) | ns | 4.5 m (2-arms) | NA | 5.5 m (2-arms) | NA | NA | NA | mEFS: 4.5 m  (2-arms) | NA |
| Hiddermann et al. 1993 [41] (Table 2) | **S-HAM:** Ara C + MITO  <60 years: Ara C (3 g/m2/12h) + MITO  <60 years: Ara C (1 g/m2/12h) + MITO  ≥60 years: Ara C (1 g/m2/12h) + MITO  ≥60 years: Ara C (0.5 g/m2/12h) + MITO | CR: 28 (52)  CR: 24 (44)  CR: 10 (48)  CR: 10 (45)  P> 0.05 | ns | 4.5 m (4-arms) | NA | 5 m  (4-arms) | NA | NA | NA | NA | NA |
| Vogler et al. 1994 [20] (Tables 1 & 5) | Ara C  vs  Ara C + ETOP | CR: 21 (31)  vs  CR: 25 (38) | ns | 11.9 m  vs  25 m | NA | 3.7 m  vs  5.2 m | ns | NA | NA | DFS at 5y: 6%  vs  DFS at 5y: 8% | ns |
| Ohno et al. 1994 [66] (Table 3) | Ara C + MITO + ETOP + G-CSF  or  Ara C + MITO + ETOP + placebo | CR: 13 (54)  vs  CR: 11 (42) | ns | NA |  | NA |  | NA |  | DFS at 2 y  EFS at 2 y  (data not shown) | 0.54  0.36 |
| Willemze et al. 1997 [149] (Table 5) | DAC + AMSA  vs  DAC + IDA | CR: 8 (27)  vs  CR: 15 (45) | ns | NA | NA | NA | NA | NA | NA | mDFS 8 m  DFS at 1 y: 20% (2-arms) | NA |
| Kern et al. 1998 [5] (Table 2) | **S-HAM:** Ara C + MITO  <60 years: Ara C (3 g/m2/12h) + MITO  <60 years: Ara C (1 g/m2/12h) + MITO  ≥60 years: Ara C (1 g/m2/12h) + MITO  ≥60 years: Ara C (0.5 g/m2/12h) + MITO | CR: 38 (52)  CR: 29 (45)  CR: 11 (44)  CR: 10 (43) | ns | 2.9 m  vs  2.4 m | 0.88 | 4.2 m  vs  5.3 m | 0.78 | NA | NA | mDFS 5.3 m  vs  mDFS 3.3 m | 0.35 |
| Karanes et al. 1999 [21] (Tables 1 & 2) | Ara C  vs  Ara C + MITO | CR: 26 (32)  vs  CR: 36 (44) | 0.15 | 9 m  vs  5 m | 0.94 | 8 m  vs  6 m | 0.30 | NA | NA | NA | NA |
| Thomas et al. 1999 [69] (Table 3) | **EMA-94:** Ara C + MITO + ETOP + GM-CSF  vs  Ara C + MITO + ETOP + placebo | CR: 62 (65)  vs  CR: 57 (59) | 0.35 | 5.1 m  vs  3.8 m | 0.08 | 10.1 m  vs  8.5 m | 0.32 | NA | NA | mDFS 8.4 m  vs  mDFS 8 m | 0.45 |
| Belhabri et al. 1999 [154] (Table 5) | IDA + CARBO  vs  MITO + CARBO | CR: 8 (29)  vs  CR: 7 (28) | 0.79 | NA | NA | 2 m  vs  2.5 m | 0.49 | NA | NA | mDFS 2 m  vs  mDFS 2.5 m | 0.81 |
| List et al. 2001 [49] (Table 2) | Ara C + DNR  vs  Ara C + DNR + CsA | CR: 35 (33)  vs  CR: 47 (39) | 0.08 | NA | NA | NA | NA | OS at 2 y: 12%  vs  OS at 2 y: 22% | 0.01 | RFS at 2 y: 9%  vs  RFS at 2 y: 34% | 0.031 |
| Liu Yin et al. 2001 [71] (Table 3) | **ADE 10+3+5:** Ara C + DNR + ETOP  vs  **Sequencial ADE:** Ara C + DNR + ETOP | CR: 46 (54)  vs  CR: 28 (33) | 0.01 | NA | NA | NA | NA | OS at 3 y: 12%  vs  OS at 3 y: 6 % | 0.03 | DFS at 3 y: 22%  vs  DFS at 3 y: 14% | ns |
| Milligan et al. 2006 [75] (Tables 3 & 4) | **ADE 10+3+5:** Ara C + DNR + ETOP  vs  **FLA:** Ara C + FLU | CR: 79 (63)  vs  CR: 76 (61) | 0.60 | NA | NA | NA | NA | OS at 4 y: 27%  vs  OS at 4 y: 16% | 0.05 | DFS at 4 y: 29%  vs  DFS at 4 y: 23% | 0.50 |
| Giles et al. 2009 [22] (Tables 1 & 5) | Ara C + placebo  vs  Ara C + Laromustine | CR: 16 (19)  vs  CR: 62 (35) | 0.005 | NA | NA | 5.8 m  vs  4.2 m | 0.09 | NA | NA | mPFS 1.1 m  vs  mPFS 1.8 m | <0.01 |
| Litzow et al. 2010 [52] (Tables 2 & 5) | Ara C + DNX  vs  Ara C + GO  vs  Ara C + CY + TOPO | CR: 2 (7)  vs  CR: 3 (12)  vs  CR: 1 (4) | ns | NA | NA | 2.4 m  vs  3.7 m  vs  3.8 m | 0.70 | NA | NA | NA | NA |
| Faderl et al 2012 [23] (Tables 1 & 4) | Ara C + placebo  vs  CLOFA + Ara C | CR: 28 (18)  vs  CR: 57 (35) | <0.01 | 3.8 m  vs  7.6 m | NA | 6.3 m  vs  6.6 m | ns | NA | NA | EFS at 4m: 17%  vs  EFS at 4m: 38% | <0.01 |
| Zhang et al. 2013 [54] (Tables 2 & 3) | **CAG:** Ara C + ACLA + G-CSF  vs  **E-CAG:** Ara C + ACLA +ETOP + G-CSF | CR: 58 (51)  vs  CR: 81 (71) | <0.01 | NA | NA | NA | NA | OS at 5 y: 24%  vs  OS at 5 y: 27% | 0.27 | NA | NA |
| Fiegl et al. 2014 [55] (Tables 2 & 4) | **SHAI:** Ara C + IDA  vs  **F-SHAI:** Ara C + IDA + FLU | CR: 59 (42)  vs  CR: 76 (54) | 0.06 | 2 m  vs  3.4 m | ns | 5.8 m  vs  6.7 m | 0.48 | NA | NA | mDFS 3.9 m  vs  mDFS 5.8 m | 0.31 |
| Roboz et al. 2014 [136]  (Table 5) | ELACYT  vs  Control treatment | CR: 39 (23)  vs  CR: 35 (21) | ns | 5.1 m  vs  3.7 m | ns | 3.5 m  vs  3.3 m | 0.96 | NA | NA | NA | NA |
| Ravandi et al. 2015 [24] (Tables 1 & 5) | Ara C + placebo  vs  VOSAROXIN + Ara C | CR: 66 (19)  vs  CR: 132 (37) | <0.01 | NA | NA | 6.1 m  vs  7.5 m | 0.06 | NA | NA | NA | NA |
| Cortes et al. 2015 [57] (Table 2) | CPX-351  vs  Other salvage regimens | CR: 40 (49)  vs  CR: 18 (41) | ns | NA | NA | 8.5 m  vs  6.3 m | 0.33 | OS at 1 y: 36%  vs  OS at 1 y: 27% | 0.33 | mEFS 4 m  vs  mEFS 1.5 m | 0.08 |
| Thiel et al. 2015 [122] (Table 4) | **MITO-FLAG (B):** Ara C (1 g/m2/12h B) + MITO + FLU + G-CSF  vs  **MITO-FLAG (CI):** Ara C (150 mg/m2 CI) + MITO + FLU + G-CSF | CR: 69 (54)  vs  CR: 53 (43) | 0.10 | NA | NA | 7.1 m  vs  6.6 m | 0.53 | OS at 2 & 5 y: 29 & 23%  vs  OS at 2 & 5 y: 24 & 19% | ns | mDFS 7.8 m  vs  mDFS 7.1 m  mEFS 2.9 m  vs  mEFS 2.0 m | 0.53  0.30 |

**Abbreviations.** ACLA: aclarubicin, AMSA: amsacrine, Ara-C: cytarabine, ASNase: asparraginase, AZA: azacitidine, B: bolus, CARBO: carboplatin, CI: continuous infusion, CLOFA: clofarabine, CR: complete remission, CsA: cyclosporine, CY: cyclophosphamide, d: days, DAC: decitabine, DFS: disease-free survival, DNR: daunorubicin, DNX: liposomal daunorubicin, EFS: event-free survival, ELACYT: elacytarabine, ETOP: etoposide, FLU: fludarabine, G-CSF: granulocyte colony-stimulating factor, GO: gemtuzumab ozogamicin, IDA: idarubicin, m: months, mCRD: median CR duration, mDFS: median disease-free survival, mEFS: median event-free survival, MITO: mitoxantrone, mOS: median overall survival, mPFS: median progression-free survival, NA: not available, ns: non-significant, OS: overall survival, TOPO: topotecan, y: year.
